# Supplementary material for: Ccl3 enhances docetaxel chemosensitivity in breast cancer by triggering proinflammatory macrophage polarization
Source: PubMed Central journal article supplement — J Immunother Cancer. 2022 May 24;10(5):e003793. doi: 10.1136/jitc-2021-003793 (PMC9134178; doi:10.1136/jitc-2021-003793), 2022-05-24
Supplement: jitc-2021-003793supp001.pdf [file jitc-2021-003793supp001.pdf]

## Ccl3 enhances docetaxel chemosensitivity in breast cancer by triggering proinflammatory macrophage polarization

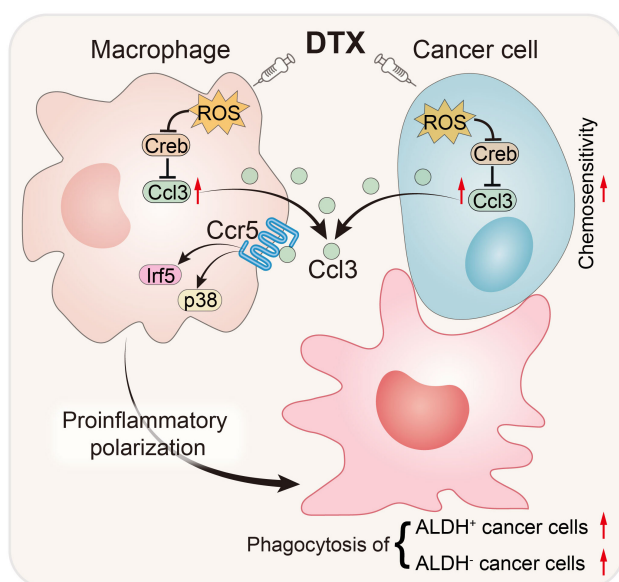

### Authors

Dandan Sheng, Wei Ma, Rui Zhang, Lei Zhou, Qiaodan Deng, Juchuanli Tu, Weilong Chen, Fuchuang Zhang, Nailong Gao, Mengxue Dong, Dong Wang, Fengkai Li, Yin Liu, Xueyan He, Shengzhong Duan, Lixing Zhang, Tong Liu, Suling Liu

### Correspondence

suling@fudan.edu.cn, liutong@hrbmu.edu.cn

### In Brief

CC motif chemokine ligand 3 (Ccl3) induced by docetaxel (DTX) triggers proinflammatory macrophage polarization and subsequently facilitates phagocytosis of cancer cells. Ccl3 induction in combination with DTX may provide a promising therapeutic strategy to overcome chemoresistance and achieve better clinical outcomes in patients with breast cancer.
