# Supplementary material for: Ccl3 enhances docetaxel chemosensitivity in breast cancer by triggering proinflammatory macrophage polarization
Source: PubMed Central journal article supplement — J Immunother Cancer. 2022 May 24;10(5):e003793. doi: 10.1136/jitc-2021-003793 (PMC9134178; doi:10.1136/jitc-2021-003793), 2022-05-24
Supplement: jitc-2021-003793supp002.pdf [file jitc-2021-003793supp002.pdf]

## Supplementary Tables

Table S1. Primer pairs for overexpression vectors

| Primer name | Forward primer (5' to 3')                         | Reverse primer (5' to 3')                            |
|-------------|---------------------------------------------------|------------------------------------------------------|
| pSIN-Ccl3   | gtcgtgaggaattgGGATCCGCC<br>ACCatgaaggctccaccac    | GCTTCATATGTTCTGAAGAATT<br>Ctcaggcattcagttccag        |
| pSIN-Creb   | gtcgtgaggaattgGGATCCGCC<br>ACCatgacatggaatctggagc | TTCATATGTTCTGAAGAATTCTt<br>aatctgatttggcagtaaaggctct |

Table S2. Primer pairs for shRNA vectors

| shRNA clone | Forward primer (5' to 3')                             | Reverse primer (5' to 3')                             |
|-------------|-------------------------------------------------------|-------------------------------------------------------|
|             | shNT                                                  | CTCGAGTTGGTGCTCTTCATCTTGTTGTTTTGAATTCTC<br>GACCTCGAG  |
| Ccl3-sh1    | CTCGAGATAGTCAACGATGAATTGGCGTTTTTGAATTCT<br>CGACCTCGAG | CTATCTCGAGATAGTCAACGATGAATTGGCGCGGTGTTT<br>CGTCCTTTCC |
| Ccl3-sh3    | CTCGAGATCTGCCGTTTCTCTTAGTCTTTTTGAATTCTC<br>GACCTCGAG  | AGATCTCGAGATCTGCCGTTTCTCTTAGTCCGGTGTTT<br>CGTCCTTTCC  |
| Ccr1-sh2    | CTCGAGTAAACACTAGAGAATACAGGGTTTTTGAATTCT<br>CGACCTCGAG | TTTACTCGAGTAAACACTAGAGAATACAGGGCGGTGTTT<br>CGTCCTTTCC |
| Ccr1-sh3    | CTCGAGTATCTGTCAATCGTCAACAGGTTTTTGAATTCTC<br>GACCTCGAG | GATACTCGAGTATCTGTCAATCGTCAACAGGCGGTGTTT<br>CGTCCTTTCC |
| Ccr5-sh2    | CTCGAGATGACCATCTTTAATGTTTGGTTTTTGAATTCTC<br>GACCTCGAG | TCATCTCGAGATGACCATCTTTAATGTTTGGCGGTGTTT<br>CGTCCTTTCC |
| Ccr5-sh4    | CTCGAGAACTGAGAGATAACTCCGGTTTTTGAATTCT<br>CGACCTCGAG   | TGTTCTCGAGAACTGAGAGATAACTCCGGCGGTGTTT<br>TCGTCCTTTCC  |
| p38-sh1     | CTCGAGAAAGGAATCTTTCAACAAGAGGTTTTTGAATTCT              |                                                       |

|                 |                                                        |
|-----------------|--------------------------------------------------------|
|                 | CGACCTCGAG                                             |
|                 | CCTTCTCGAGAAGGAATCTTTCAACAAGAGGCCGGTGTTT<br>CGTCCTTTCC |
| <b>p38-sh2</b>  | CTCGAGTTATAGTGCATCCAATTCAGCTTTTTGAATTCTC<br>GACCTCGAG  |
|                 | ATAACTCGAGTTATAGTGCATCCAATTCAGGCCGGTGTTT<br>CGTCCTTTCC |
| <b>Irf5-sh1</b> | CTCGAGTAATCATCAGTGGGTTGGCTTTTTGAATTCTC<br>GACCTCGAG    |
|                 | ATTAICTCGAGTAATCATCAGTGGGTTGGCTCCGGTGTTT<br>CGTCCTTTCC |
| <b>Irf5-sh3</b> | CTCGAGTTAAACTGCTCTACCATGTGGTTTTGAATTCTC<br>GACCTCGAG   |
|                 | TAACTCGAGTTAAACTGCTCTACCATGTGGCCGGTGTTT<br>CGTCCTTTCC  |
| <b>Creb-sh1</b> | CTCGAGTAGAATCTGCTGTCCATCAGTTTTTTGAATTCTC<br>GACCTCGAG  |
|                 | TCTACTCGAGTAGAATCTGCTGTCCATCAGTCGGTGTTT<br>CGTCCTTTCC  |
| <b>Creb-sh2</b> | CTCGAGATTCTGTAGTTGCTTTTCAGGCTTTTTGAATTCTC<br>GACCTCGAG |
|                 | GAATCTCGAGATTCTGTAGTTGCTTTTCAGGCCGGTGTTT<br>CGTCCTTTCC |

Note: The guide sequences of shRNA were highlighted in bold.

**Table S3. Primer pairs for qRT-PCR**

| Genes          | Forward primer (5' to 3') | Reverse primer (5' to 3')    |
|----------------|---------------------------|------------------------------|
| Ccl3           | ACCATGACACTCTGCAACCA      | GATGAATTGGCGTGGAATCT         |
| Tbp            | CCCACAACCTCTTCCATTCT      | GCAGGAGTGATAGGGGTCAT         |
| iNos           | CTGGTGGTGACAAGCACAT<br>TT | ATGTCATGAGCAAAGGCGCA<br>GAAC |
| Cox2           | CCCTGCTGCCCGACACCTT<br>C  | CCAGCAACCCGGCCAGCAAT         |
| Ccr1           | ACTCCACTCCATGCCAAAAG      | CTAGGACATTGCCACCACT          |
| Ccr5           | CGAAAACACATGGTCAAAC<br>G  | GTTCTCCTGTGGATCGGGTA         |
| Creb           | ACCCAGGGAGGAGCAATAC<br>AG | TGGGGAGGACGCCATAACA          |
| Sirp- $\alpha$ | CCACGGGGAAGGAACTGAA<br>G  | ACGTATTCTCCTGCGAAACT<br>GTA  |
| Ccl1           | GGCTGCCGTGTGGATACAG       | AGGTGATTTTGAACCCACGT<br>TT   |

|        |                             |                             |
|--------|-----------------------------|-----------------------------|
| Ccl2   | TTAAAAACCTGGATCGGAAC<br>CAA | GCATTAGCTTCAGATTTACG<br>GGT |
| Ccl4   | TTCCTGCTGTTTCTCTTACA<br>CCT | CTGTCTGCCTCTTTTGGTCA<br>G   |
| Ccl5   | GCTGCTTTGCCTACCTCTCC        | TCGAGTGACAAACACGACTG<br>C   |
| Ccl6   | GCTGGCCTCATACAAGAAAT<br>GG  | GCTTAGGCACCTCTGAACTC<br>TC  |
| Ccl7   | GCTGCTTTCAGCATCCAAGT<br>G   | CCAGGGACACCGACTACTG         |
| Ccl8   | TCTACGCAGTGCTTCTTTGC<br>C   | AAGGGGGATCTTCAGCTTTA<br>GTA |
| Ccl9   | CCCTCTCCTTCCTCATTCTT<br>ACA | AGTCTTGAAAGCCCATGTGA<br>AA  |
| Ccl11  | GAATCACCAACAACAGATG<br>CAC  | ATCCTGGACCCACTTCTTCTT       |
| Ccl12  | ATTTCCACACTTCTATGCCT<br>CCT | ATCCAGTATGGTCCTGAAGA<br>TCA |
| Ccl17  | TACCATGAGGTCACCTCAGA<br>TGC | GCACTCTCGGCCTACATTGG        |
| Ccl19  | GGGGTGCTAATGATGCGGA<br>A    | CCTTAGTGTGGTGAACACAA<br>CA  |
| Ccl20  | GCCTCTCGTACATACAGAC<br>GC   | CCAGTTCTGCTTTGGATCAG<br>C   |
| Ccl21a | GTGATGGAGGGGGTCAGGA         | GGGATGGGACAGCCTAAACT        |
| Ccl22  | AGGTCCCTATGGTGCCAAT<br>GT   | CGGCAGGATTTTGAGGTCCA        |
| Ccl24  | TCTTGCTGCACGTCCTTTAT<br>T   | GCATCCAGTTTTTGTATGTG<br>CC  |
| Ccl25  | TTACCAGCACAGGATCAAAT<br>GG  | CGGAAGTAGAATCTCACAGC<br>AC  |
| Ccl27a | CCTCCCGCTGTTACTGTTG         | CTTGGCGTTCTAACCACCGA        |

Note: All primers were verified for specificity via Primer-BLAST (<https://www.ncbi.nlm.nih.gov/tools/primer-blast/>) and tested by melt curve.
