# Supplementary material for: Ccl3 enhances docetaxel chemosensitivity in breast cancer by triggering proinflammatory macrophage polarization
Source: PubMed Central journal article supplement — J Immunother Cancer. 2022 May 24;10(5):e003793. doi: 10.1136/jitc-2021-003793 (PMC9134178; doi:10.1136/jitc-2021-003793), 2022-05-24
Supplement: jitc-2021-003793supp003.pdf [file jitc-2021-003793supp003.pdf]

## 1 **Supplemental figure legends**

2 The uncropped blots of the western blotting experiments are exhibited (online  
3 supplemental figure S9–S12).

### 4 **Figure S1 Ccl3 is significantly induced in macrophages by DTX.**

5 (A) Experimental design scheme of macrophage clearance for DTX  
6 chemotherapy.

7 (B) IHC staining of CD68 (a pan-macrophage marker) with paraffin-embedded  
8 tumor sections. The representative pictures are shown, and the bar graph  
9 represents the fold change of CD68<sup>+</sup> cell percentage in six random fields under  
10 40× objective. Scale bar: 100 μm.

11 (C) Tumor image for figure 1A.

12 (D) qRT-PCR was performed to quantify Ccl3 expression after DTX (10 nM for  
13 iBMMs and 30 nM for BMDMs) treatment for 2 and 3 days in iBMMs and  
14 BMDMs.

15 (E) qRT-PCR was performed to quantify Ccl3 expression after DTX treatment  
16 at indicated concentrations in iBMMs and BMDMs.

17 (F) Tumors of 4T1 orthotopic allografts were digested and sorted by  
18 fluorescence-activated cell sorting assay. Different sub-populations, including  
19 total cells (cancer and immune cells), CD45<sup>+</sup> cells (whole immune cells),  
20 CD45<sup>+</sup>CD11b<sup>+</sup>F4/80<sup>+</sup> cells (Mac), CD45<sup>+</sup>CD19<sup>+</sup> cells (B cells) and CD45<sup>+</sup>CD3<sup>+</sup>  
21 cells (T cells) were obtained to analyze the expression levels of Ccl3, Ccr1 and

22 Ccr5 by qRT-PCR.

23 Tbp was used as the internal control. Data are presented as mean±SEM.

24 \*P<0.05, \*\*p<0.01, \*\*\*p<0.001, \*\*\*\*p<0.0001. BMDMs, bone marrow-derived

25 macrophages; Ccl3, C–C motif chemokine ligand 3; Ccr, C–C motif chemokine

26 receptor; CLD-Lp, Clodronate liposomes; DTX, docetaxel; IHC,

27 immunohistochemistry; iBMMs, immortalized bone marrow-derived

28 macrophages; Mac, macrophage; PBS-Lp, PBS liposomes; qRT-PCR,

29 quantitative real-time PCR; Tbp, TATA-binding protein; Veh, vehicle.

30

31 **Figure S2 Ccl3 enhances the chemotherapeutic efficacy of DTX in breast**

32 **cancer.**

33 (A) Knockout effect was determined in all three mouse strains, including

34 C57BL/6, FVB and BALB/c, using BM cells stimulated with LPS (1 µg/ml) for 4

35 hours via western blotting.

36 (B) Expression levels of C–C chemokines were quantified in WT and *Ccl3*<sup>-/-</sup>

37 BMDMs using qRT-PCR.

38 (C-E) At the end of the experiment in figure 1G, mice were sacrificed. The

39 harvested tumors were photographed (left) and weighed (right).

40 (F) HE staining of paraffin-embedded tumor sections obtained in figure 1G.

41 Areas of necrosis were separated from tumor mass by black dotted lines and

42 indicated by a red star. Scale bar: 100 µm.

43 (G-H) At the end of the experiment in figure 1H, mice were sacrificed. The  
44 harvested tumors were photographed (left) and weighed (right).  
45 (I) Knockdown efficiency of Ccl3 in iBMMs was measured via western blotting.  
46 Gapdh was used as the loading control. Tbp was used as the internal control.  
47 Data are presented as mean±SEM. \*P<0.05, \*\*p<0.01, \*\*\*p<0.001,  
48 \*\*\*\*p<0.0001; NS, no significance. BM, bone marrow; BMDMs, bone  
49 marrow-derived macrophages; Ccl3, C–C motif chemokine ligand 3; DTX,  
50 docetaxel; Gapdh, glyceraldehyde-3-phosphate dehydrogenase; HE,  
51 hematoxylin and eosin; iBMM, immortalized bone marrow-derived  
52 macrophages; LPS, lipopolysaccharide; qRT-PCR, quantitative real-time PCR;  
53 sh, short hairpin RNA; shNT, short hairpin RNA of non-target; Tbp,  
54 TATA-binding protein; Veh, vehicle; WT, wild type.

55

56 **Figure S3 DTX-induced proinflammatory macrophage polarization is**  
57 **abolished by Ccl3-knockout.**

58 (A) Flow cytometry gating strategy of proinflammatory macrophages using  
59 cells from digested tumor of 4T1 allografts.

60 (B) Paraffin-embedded tumor sections obtained in figure 1G were used for IHC  
61 staining with antibody against CD68 and Cox2 (proinflammatory macrophage  
62 marker). The representative pictures are shown, and the bar graphs represent  
63 the fold change of CD68<sup>+</sup>Cox2<sup>+</sup> cell percentage in six random fields under 40×

64 objective. Scale bar: 100  $\mu$ m.

65 (C) Knockdown efficiencies of Ccr1 and Ccr5 in iBMMs were measured via  
66 qRT-PCR.

67 Tbp was used as the internal control. Data are presented as mean $\pm$ SEM.

68 \*\*P<0.01, \*\*\*\*p<0.0001. Ccl3, C–C motif chemokine ligand 3; Ccr, C–C motif  
69 chemokine receptor; Cox2, cyclooxygenase; DTX, docetaxel; IHC,  
70 immunohistochemistry; iBMMs, immortalized bone marrow-derived  
71 macrophages; qRT-PCR, quantitative real-time PCR; Tbp, TATA-binding  
72 protein; Veh, vehicle; WT, wild type.

73

74 **Figure S4 Ccl3 is indispensable for DTX-enhanced macrophage**  
75 **phagocytosis of cancer cells, including CSCs.**

76 (A) DTX-pretreated iBMMs were cocultured with total Py8119 cells at both  
77 37°C (upper panel) and 4°C (lower panel) for in vitro phagocytosis assay and  
78 analyzed via flow cytometry.

79 (B) DTX-pretreated iBMMs (GFP-labeled) were cocultured with total Py8119  
80 cells (mCherry-labeled) at both 37°C (upper panel) and 4°C (lower panel) for in  
81 vitro phagocytosis assay and analyzed by directly visualized confocal  
82 microscope photography.

83 (C) Representative images for figure S4B. The different stages of  
84 phagocytosis showing macrophages from contacting to internalizing cancer

85 cells were observed at 37°C. Scale bar: 30 µm.

86 (D-E) In vitro phagocytosis assay was performed using DTX-pretreated iBMMs  
87 cocultured with sorted ALDH<sup>-</sup> or ALDH<sup>+</sup> Py8119 cells and analyzed by flow  
88 cytometry analysis (D) and directly visualized confocal microscope  
89 photography (E).

90 Data are presented as mean±SEM. \*P<0.05, \*\*p<0.01, \*\*\*p<0.001,  
91 \*\*\*\*p<0.0001. ALDH, aldehyde dehydrogenase; Ccl3, C–C motif chemokine  
92 ligand 3; CSCs, cancer stem cells; DTX, docetaxel; iBMMs, immortalized bone  
93 marrow-derived macrophages; sh, short hairpin RNA; shNT, short hairpin RNA  
94 of non-target; Veh, vehicle.

95

96 **Figure S5 Ccl3 enhances DTX chemotherapeutic efficacy and Ccl3**  
97 **overexpression suppresses tumor progression in vivo.**

98 (A) Ccl3 knockdown efficiency was measured by qRT-PCR in 4T1.

99 (B) At the end of the experiment in figure 4E, mice were sacrificed. The  
100 harvested tumors were photographed (left) and weighed (right).

101 (C) Ccl3 overexpression effect was determined via western blotting in 4T1 and  
102 Mvt1.

103 (D) At the end of the experiment in figure 4F, mice were sacrificed. The  
104 harvested tumors were photographed (left) and weighed (right).

105 (E) IHC staining of paraffin-embedded sections obtained in figure 4F using

106 antibodies against CD68 and Cox2. The representative pictures are shown,  
107 and the bar graphs represent the fold change of CD68<sup>+</sup>Cox2<sup>+</sup> cell percentage  
108 in six random fields under 40× objective. Scale bar: 100 μm.  
109 Gapdh was used as the loading control. Tbp was used as the internal control.  
110 Data are presented as mean±SEM. \*P<0.05, \*\*p<0.01, \*\*\*p<0.001,  
111 \*\*\*\*p<0.0001; NS, no significance. Ccl3, C–C motif chemokine ligand 3; Cox2,  
112 cyclooxygenase; DAPI, 4',6-diamidino-2-phenylindole; DTX, docetaxel; IHC,  
113 immunohistochemistry; qRT-PCR, quantitative real-time PCR; sh, short hairpin  
114 RNA; shNT, short hairpin RNA of non-target; Tbp, TATA-binding protein; Veh,  
115 vehicle.

116

117 **Figure S6 DTX-induced Ccl3 creates a positive feedback effect loop**  
118 **between macrophages and cancer cells.**

119 (A) 4T1 and Mvt1 were pretreated with DTX (5 nM) for 7 days, and then the  
120 drug was washed out and cells were cultured in serum-deprived medium for 2  
121 days to collect CM. Thereafter, iBMMs were cultured with the CM for 2 days  
122 and the cells were collected and lysed for western blotting to detect the  
123 expression of Ccl3, iNos and Cox2.

124 (B) 4T1 and Mvt1 overexpressing Ccl3 were cultured in serum-deprived  
125 medium for 2 days to collect CM. Thereafter, iBMMs were cultured with the CM  
126 for 2 days and the cells were collected and lysed for western blotting to detect

127 the expression of Ccl3, iNos and Cox2.

128 (C) iBMMs were pretreated with DTX (10 nM) for 7 days, and then the drug

129 was washed out and cells were cultured in serum-deprived medium for 2 days

130 to collect CM. Thereafter, 4T1 and Mvt1 were cultured with the CM for 2 days

131 and the cells were collected and lysed for qRT-PCR to quantify Ccl3

132 expression.

133 (D) Ccl3 overexpression was determined by western blotting in iBMMs.

134 (E) iBMMs with Ccl3 overexpression were cultured in serum-deprived medium

135 for 2 days to collect CM, and then 4T1 and Mvt1 were cultured with the CM for

136 2 days. The cells were collected and lysed for RNA isolation to quantify Ccl3

137 expression by qRT-PCR.

138 Gapdh was used as the loading control. Tbp was used as the internal control.

139 Data are presented as mean±SEM. \*\*P<0.01, \*\*\*p<0.001. \*\*\*\*p<0.0001. Ccl3,

140 C–C motif chemokine ligand 3; Cox2, cyclooxygenase; CM, conditioned

141 medium; DTX, docetaxel; iBMM, immortalized bone marrow-derived

142 macrophages; iNos, inducible nitric oxide synthase; qRT-PCR, quantitative

143 real-time PCR; Tbp, TATA-binding protein; Veh, vehicle.

144

145 **Figure S7 DTX induces Ccl3 by relieving the inhibitory effect of Creb via**

146 **ROS accumulation.**

147 (A) ROS levels in BMDMs and Py8119 cells treated with DTX (30 nM) for 2

148 days were determined using flow cytometry.

149 (B) Western blotting was performed to detect the expression of Ccl3, Creb and  
150 p-Creb in BMDMs treated with different concentrations of DTX (0, 10, 30 and  
151 50 nM) for 1 day.

152 (C) Western blotting was used to detect the expression of Creb and p-Creb,  
153 whereas qRT-PCR was utilized to quantify Ccl3 expression in Py8119 treated  
154 with different concentrations of DTX (0, 15, 30 and 60 nM) for 1 day.

155 (D) iBMMs and BMDMs, as well as breast cancer cell lines 4T1 and Py8119,  
156 were treated with indicated concentrations of DTX for 1 day. qRT-PCR was  
157 performed to quantify Creb expression.

158 (E) Various concentrations of H<sub>2</sub>O<sub>2</sub> (0, 50, 100 and 250 μM) were used to  
159 induce ROS in BMDMs for 16 hours. Ccl3, Creb, and p-Creb expression levels  
160 were determined via western blotting.

161 (F) Various concentrations of H<sub>2</sub>O<sub>2</sub> (0, 100, 250, 500 and 1000 μM) were used  
162 to induce ROS in Py8119 for 16 hours. Western blotting was utilized to detect  
163 the expression of Creb and p-Creb, whereas qRT-PCR was used to quantify  
164 Ccl3 expression.

165 (G) NAC (10 mM) was used to neutralize ROS in combination with DTX  
166 treatment (30 nM) for 1 day in BMDMs. Ccl3 and Creb expression levels were  
167 determined via western blotting.

168 (H) NAC (10 mM) was used to neutralize ROS in combination with DTX



169 treatment (30 nM) for 1 day in Py8119. Creb and p-Creb expression levels  
170 were determined via western blotting, whereas Ccl3 expression was quantified  
171 by qRT-PCR.

172 (I) Creb inhibitor 666-15 (200 nM) was administered to BMDMs for 12 hours.  
173 The cells were collected for western blotting and qRT-PCR analysis to detect  
174 Ccl3.

175 (J) Creb inhibitor 666-15 (200 nM) was administered to Py8119 for 12 hours.  
176 qRT-PCR was performed to quantify Ccl3 expression.

177 (K) Ccl3 expression was quantified via qRT-PCR in Py8119 knocking down  
178 Creb.

179 (L) Py8119 stable cell line overexpressing Creb was subjected to DTX (30 nM)  
180 and DOC (1 µg/ml) treatment for 2 days. Creb was cloned into an inducible  
181 pTRIPZ overexpression vector induced with DOC. The cells were collected for  
182 qRT-PCR to quantify Ccl3 expression.

183 Gapdh was used as the loading control. Tbp was used as the internal control.

184 Data are presented as mean±SEM. \*P<0.05, \*\*p<0.01, \*\*\*p<0.001,  
185 \*\*\*\*p<0.0001; NS, no significance. BMDMs, bone marrow-derived

186 macrophages; Ccl3, C–C motif chemokine ligand 3; Creb, cAMP-response  
187 element binding protein; DOC, doxycycline; DTX, docetaxel; Gapdh,

188 glyceraldehyde-3-phosphate dehydrogenase; H<sub>2</sub>O<sub>2</sub>, hydrogen dioxide; iBMM,

189 immortalized bone marrow-derived macrophages; NAC, N-acetyl-L-cysteine;

190 NES, normalized enrichment score; qRT-PCR, quantitative real-time PCR;  
191 RNA-Seq, RNA sequencing; ROS, reactive oxygen species; sh, short hairpin  
192 RNA; shNT, short hairpin RNA of non-target; Tbp, TATA-binding protein; Veh,  
193 vehicle.

194

195 **Figure S8 High CCL3 expression predicts better prognosis and Creb**  
196 **inhibitor or rmCcl3 increases DTX chemosensitivity in breast cancer.**

197 (A) IHC staining of CCL3 was performed using paired tumor sections of  
198 patients before or after TNC (n=100). CCL3 expression levels of cancer cells  
199 and TME cells were separately calculated by H-score.

200 (B-C) Representative pictures of IHC staining for figure 6C and figure 6D are  
201 shown. Scale bar: 100  $\mu$ m.

202 (D) Indicated concentrations of 666-15 and DTX were combined to treat  
203 Py8119 for 20 hours, and qRT-PCR was performed to quantify Ccl3  
204 expression.

205 (E) At the end of the experiment in figure 6G, mice were sacrificed. The  
206 harvested tumors were photographed (left) and weighed (right).

207 (F) At the end of the experiment in figure 6I, mice were sacrificed. The  
208 harvested tumors were photographed (left) and weighed (right).

209 Tbp was used as the internal control. Data are presented as mean $\pm$ SEM.

210 \*P<0.05, \*\*p<0.01, \*\*\*p<0.001, \*\*\*\*p<0.0001; NS, no significance. Ccl3, C-C

211 motif chemokine ligand 3; Cox2, cyclooxygenase 2; Creb, cAMP-response  
212 element binding protein; TNC, Taxane-containing neoadjuvant chemotherapy;  
213 DTX, docetaxel; H-score, histo-score; IHC, immunohistochemistry; qRT-PCR,  
214 quantitative real-time PCR; rmCcl3, recombinant mouse Ccl3; Tbp,  
215 TATA-binding protein; TME, tumor microenvironment; Veh, vehicle.

216

217 **Figure S9 Uncropped blots of Figure 1 and 2.**

218 **Figure S10 Uncropped blots of Figure 5 and 6.**

219 **Figure S11 Uncropped blots of Figure S2, S5 and S6.**

220 **Figure S12 Uncropped blots of Figure S7.**
