# Supplementary material for: Ccl3 enhances docetaxel chemosensitivity in breast cancer by triggering proinflammatory macrophage polarization
Source: PubMed Central journal article supplement — J Immunother Cancer. 2022 May 24;10(5):e003793. doi: 10.1136/jitc-2021-003793 (PMC9134178; doi:10.1136/jitc-2021-003793), 2022-05-24

## Figure S4

A

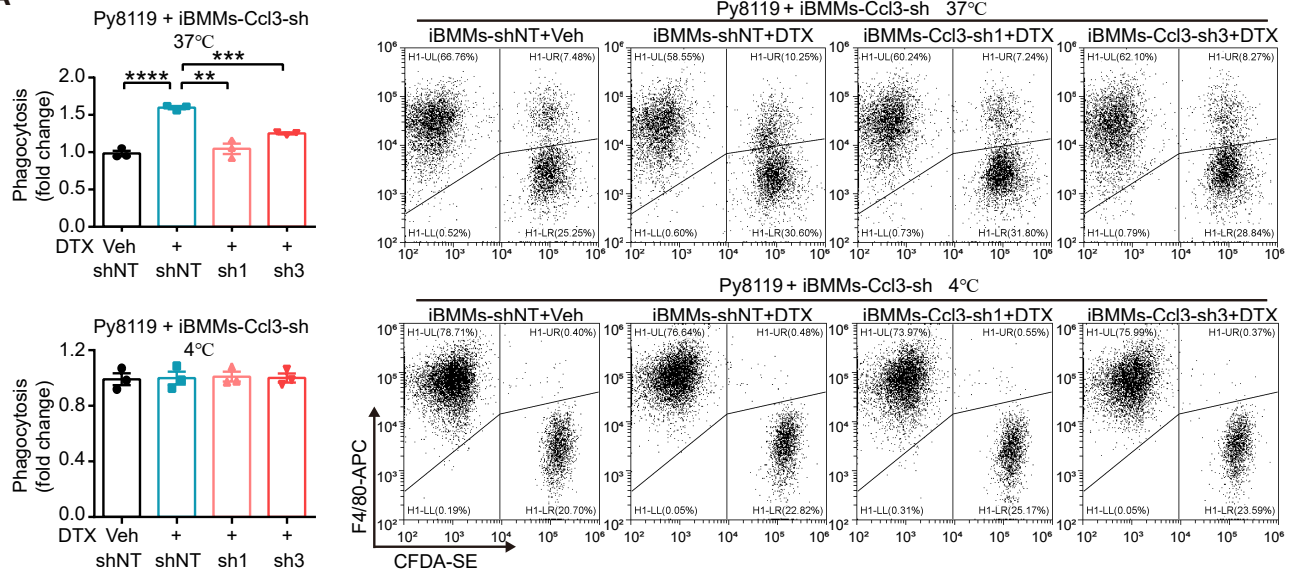

B

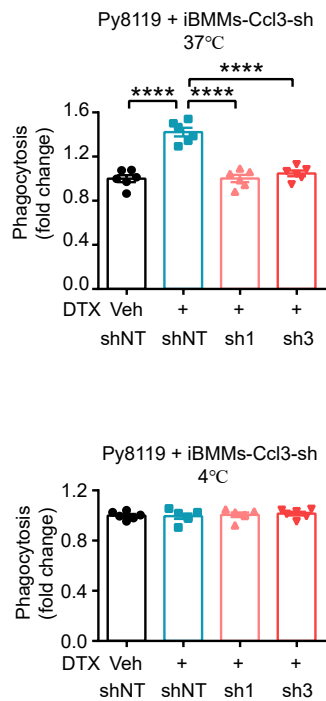

C

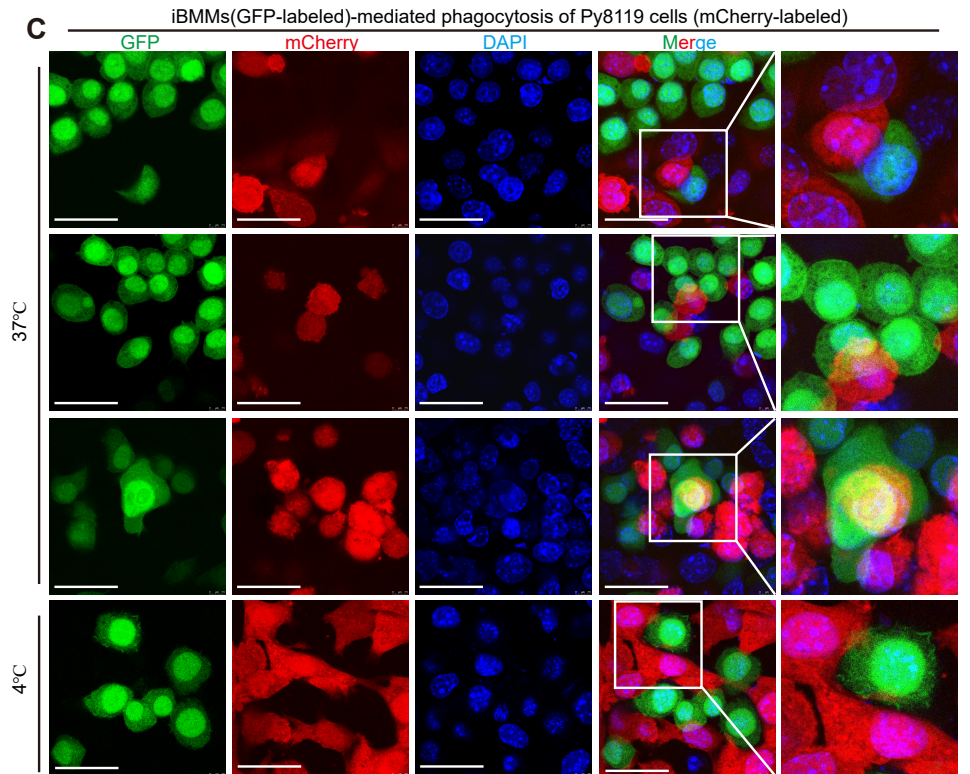D Py8119-ALDH<sup>+</sup> + iBMMs-Ccl3-sh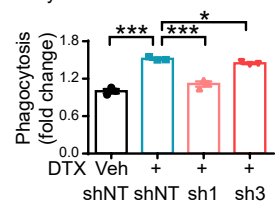Py8119-ALDH<sup>+</sup> + iBMMs-Ccl3-sh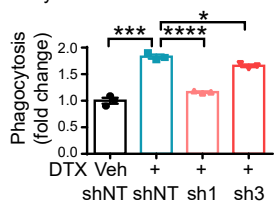E Py8119-ALDH<sup>+</sup> + iBMMs-Ccl3-sh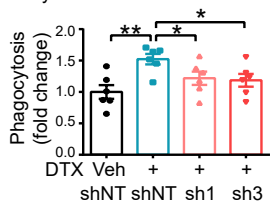Py8119-ALDH<sup>+</sup> + iBMMs-Ccl3-sh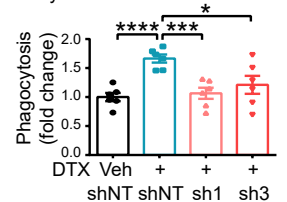

Supplement: jitc-2021-003793supp007.pdf [file jitc-2021-003793supp007.pdf]
