# Supplementary figures and images for: Ccl3 enhances docetaxel chemosensitivity in breast cancer by triggering proinflammatory macrophage polarization
Source: PubMed Central journal article supplement — J Immunother Cancer. 2022 May 24;10(5):e003793. doi: 10.1136/jitc-2021-003793 (PMC9134178; doi:10.1136/jitc-2021-003793), 2022-05-24

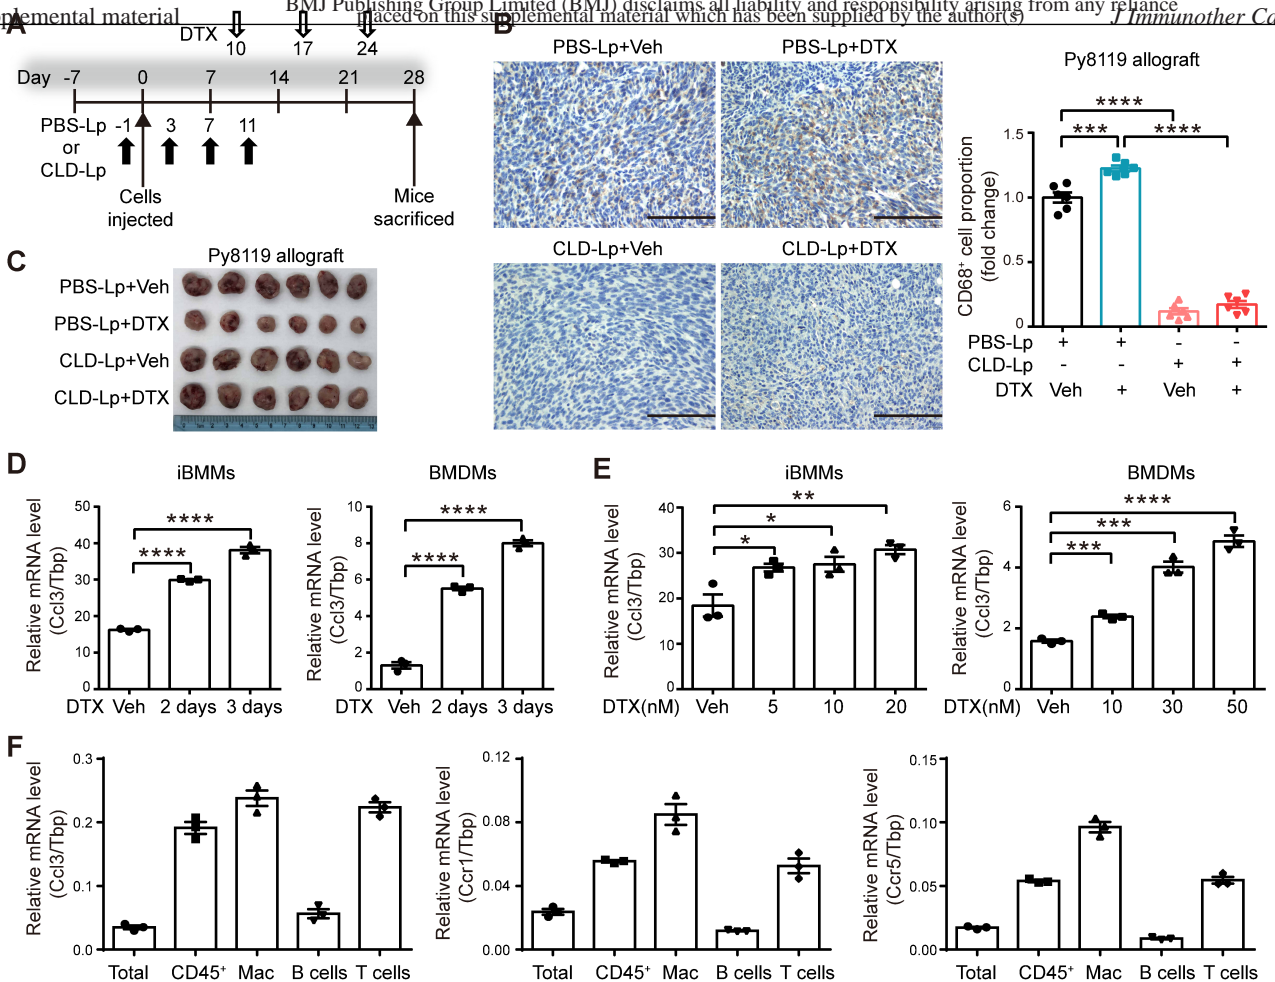

Supplement: jitc-2021-003793supp004.pdf [file jitc-2021-003793supp004.pdf]

**Figure S2**

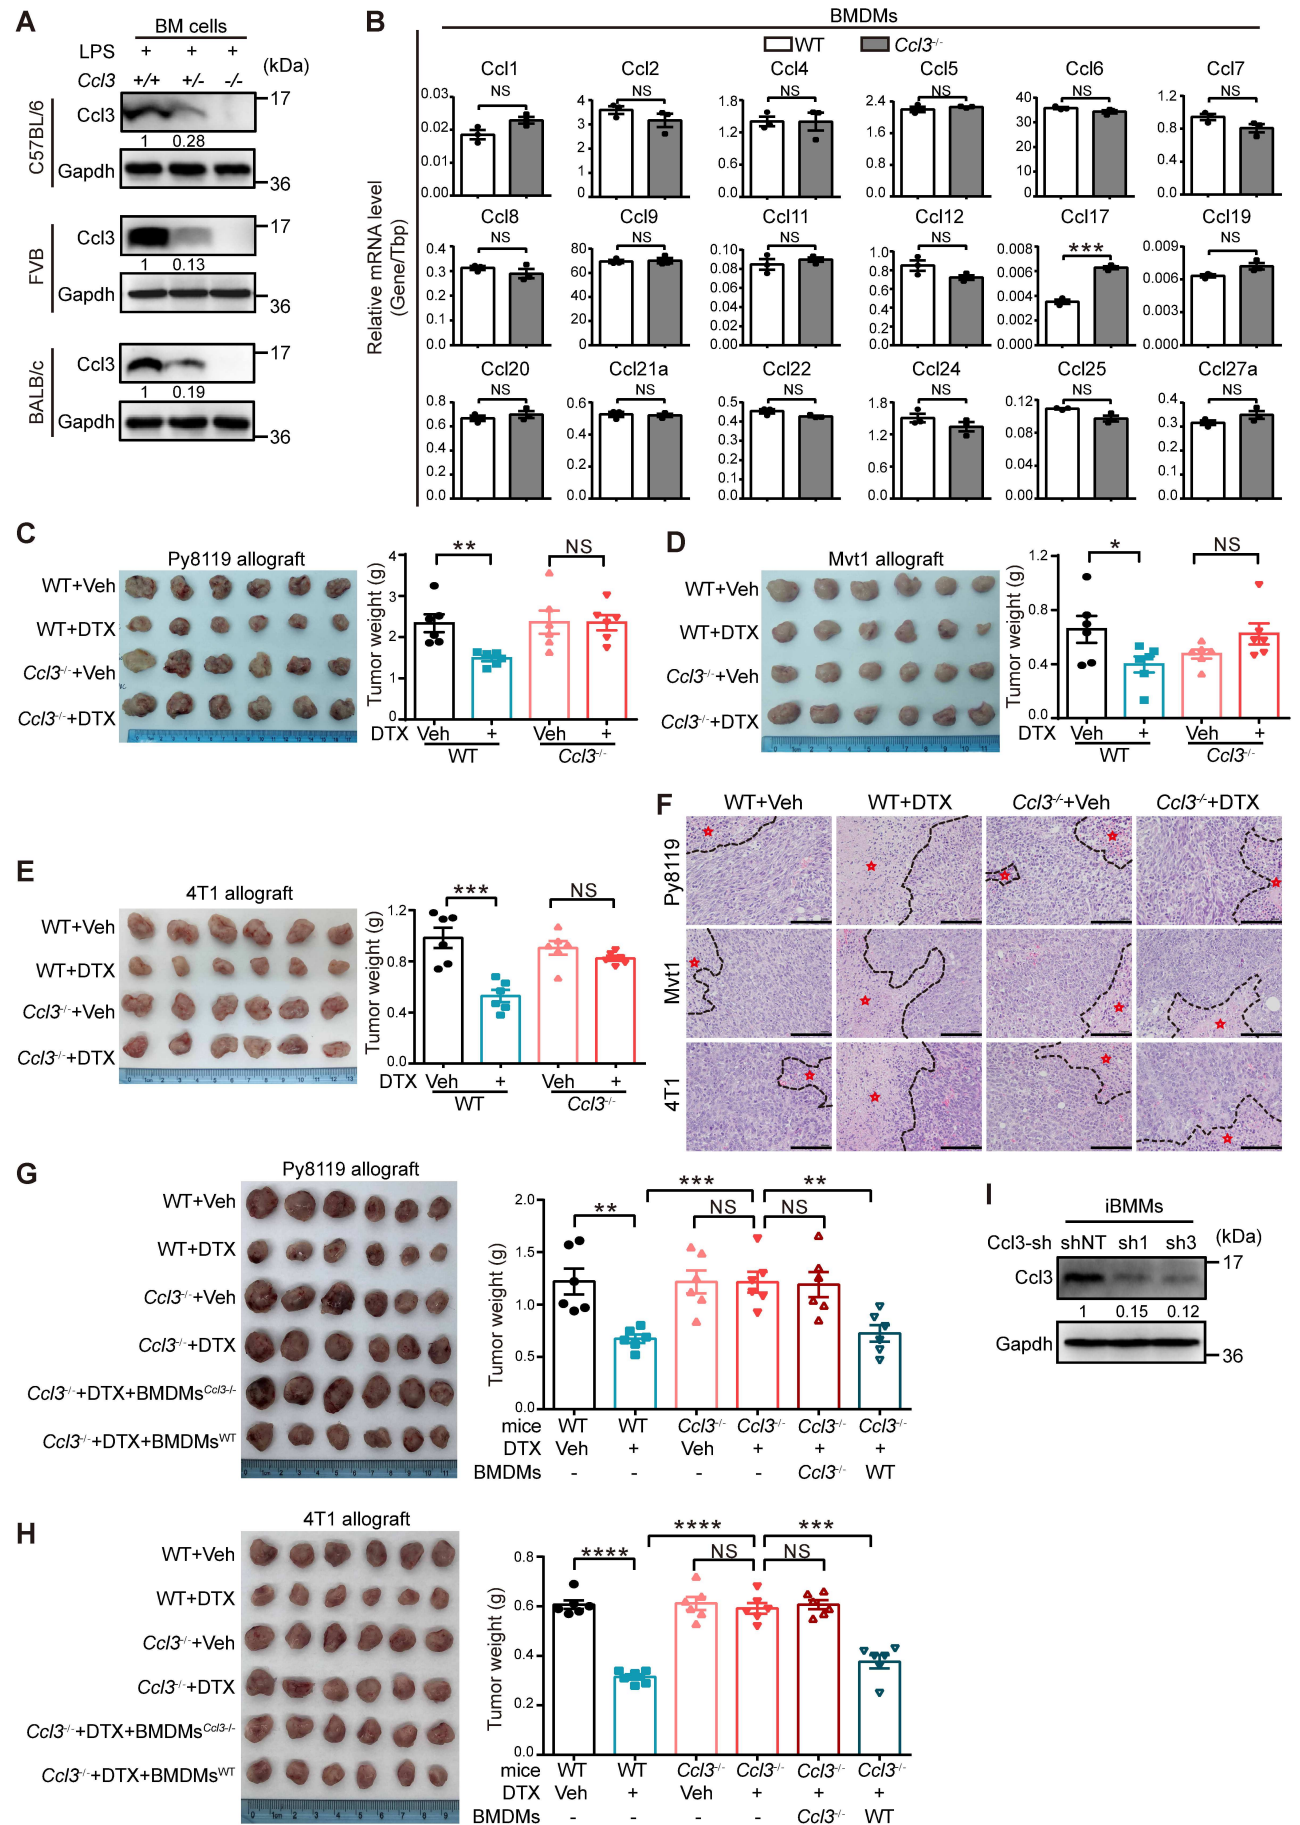

Supplement: jitc-2021-003793supp005.pdf [file jitc-2021-003793supp005.pdf]

Figure S3

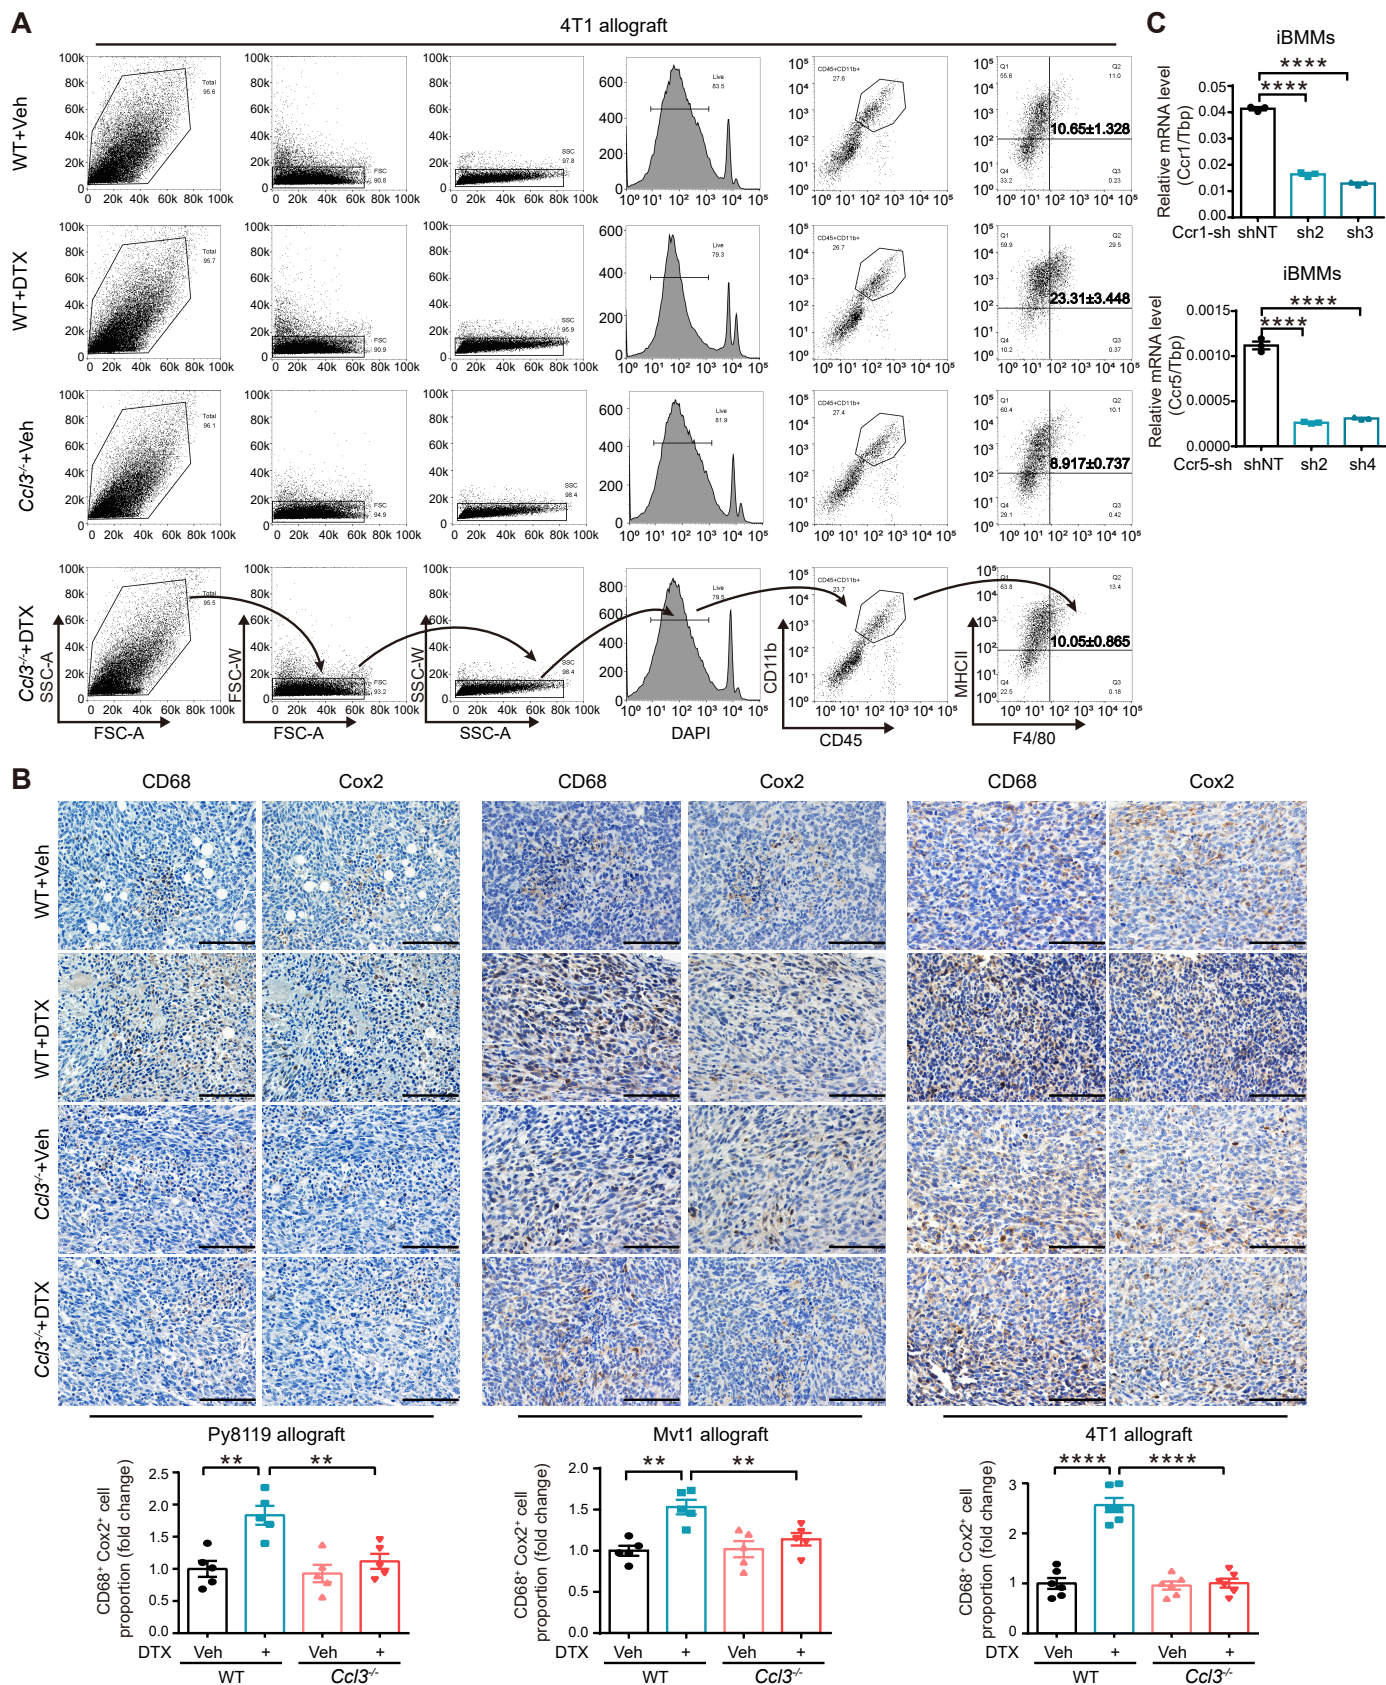

Supplement: jitc-2021-003793supp006.pdf [file jitc-2021-003793supp006.pdf]

## Figure S5

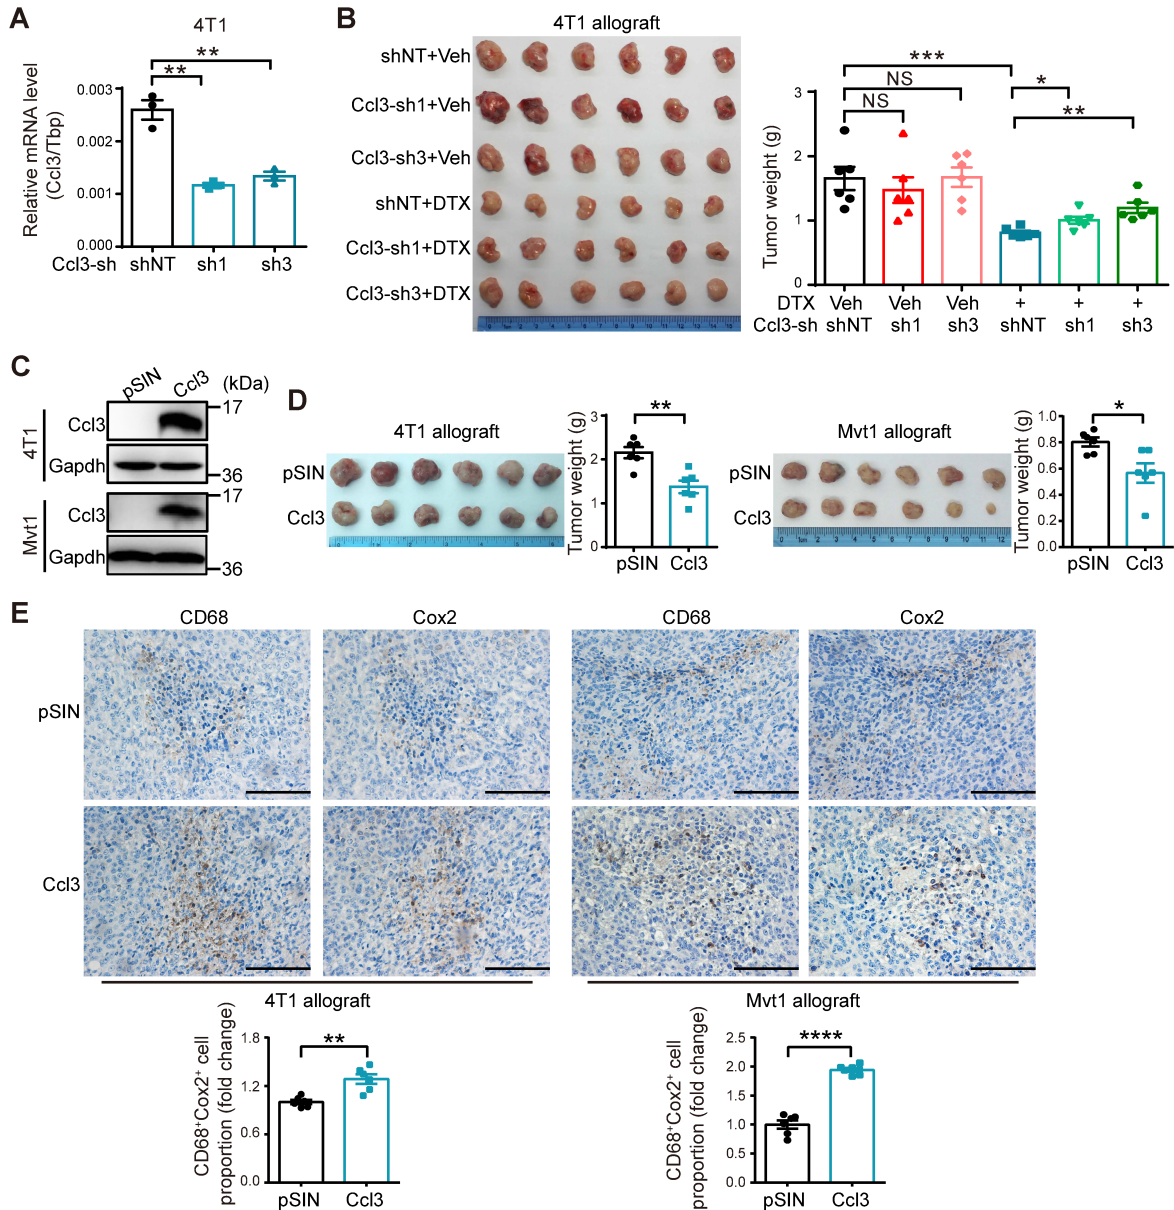

Supplement: jitc-2021-003793supp008.pdf [file jitc-2021-003793supp008.pdf]

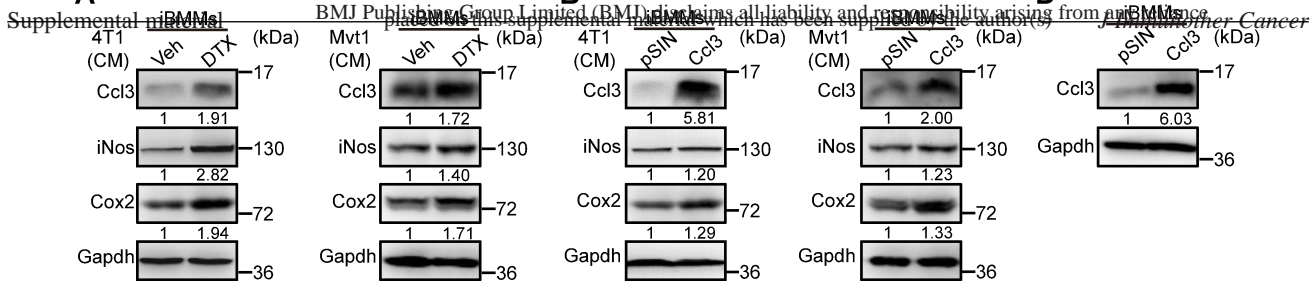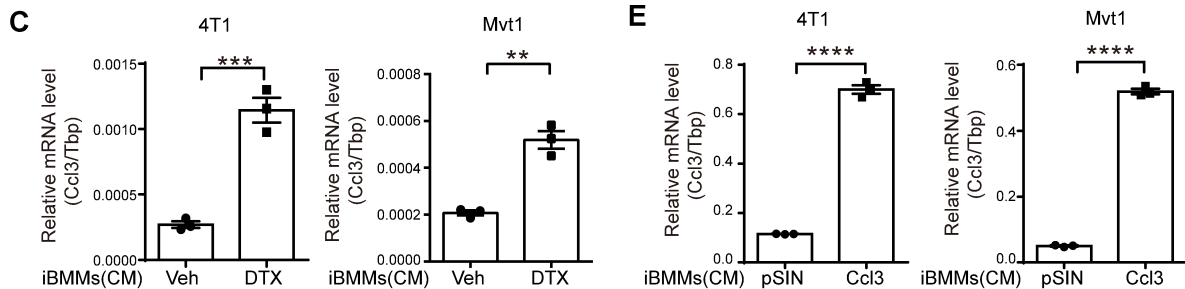

Supplement: jitc-2021-003793supp009.pdf [file jitc-2021-003793supp009.pdf]

Figure S7

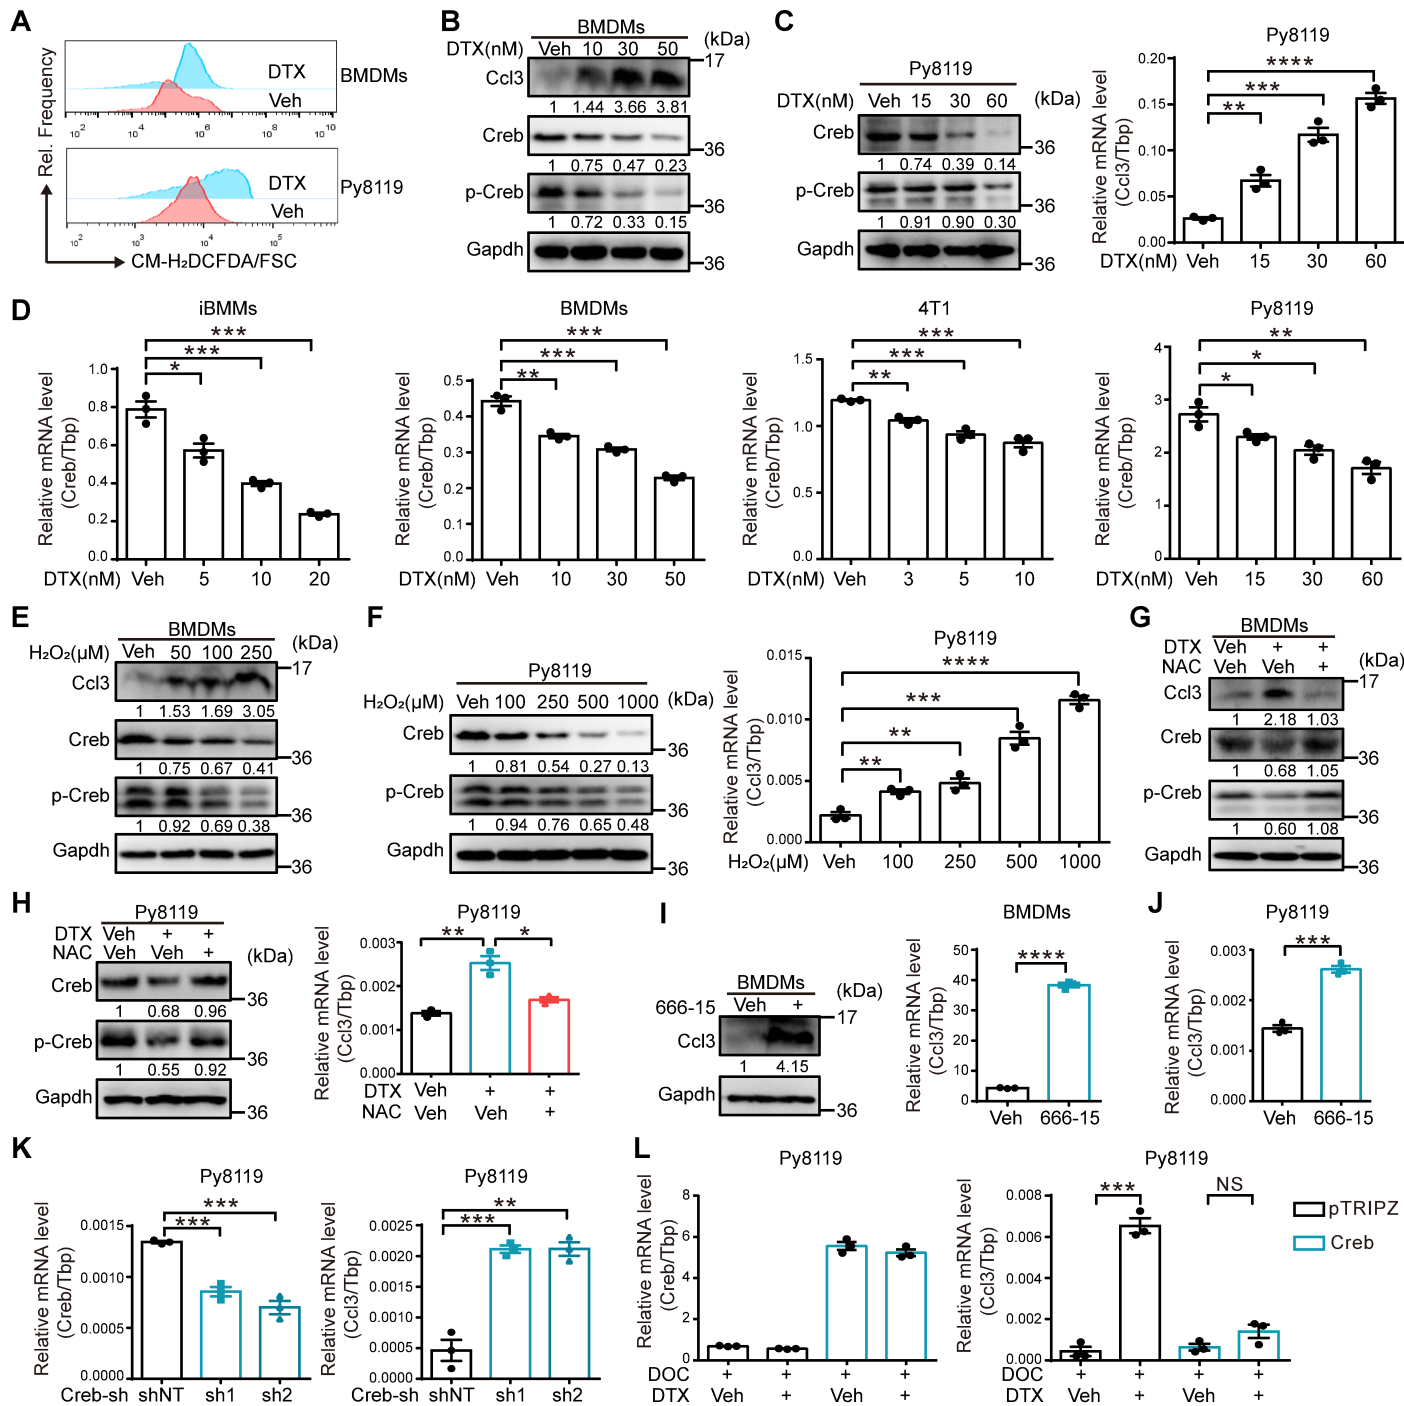

Supplement: jitc-2021-003793supp010.pdf [file jitc-2021-003793supp010.pdf]

## Figure S8

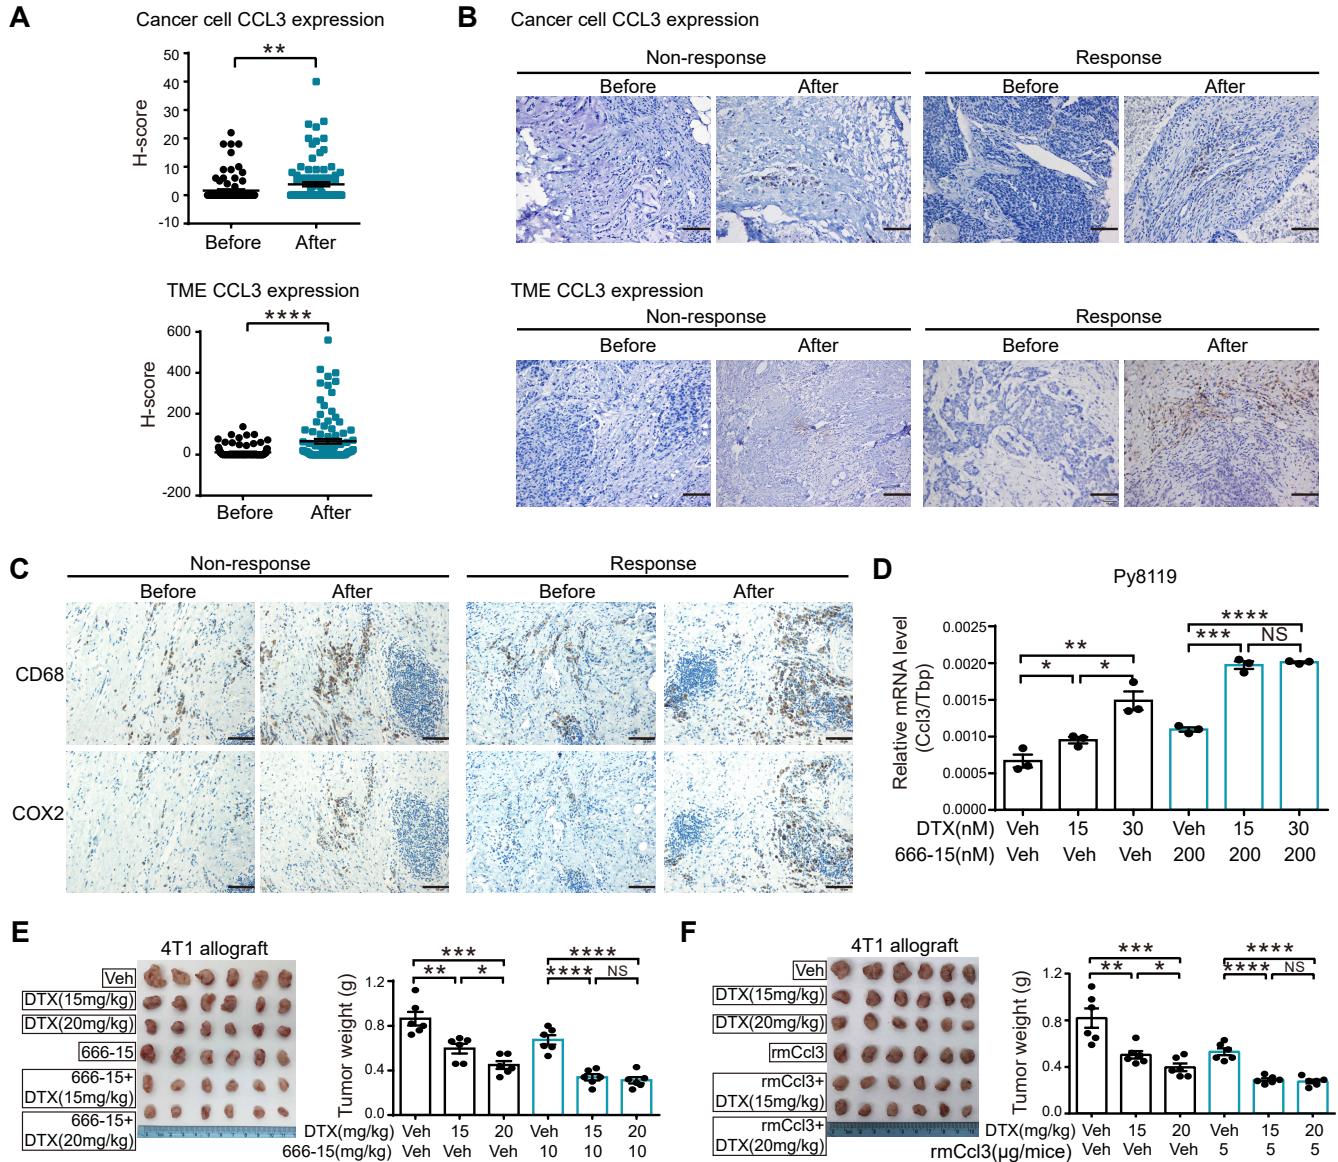

Supplement: jitc-2021-003793supp011.pdf [file jitc-2021-003793supp011.pdf]

**Figure S9**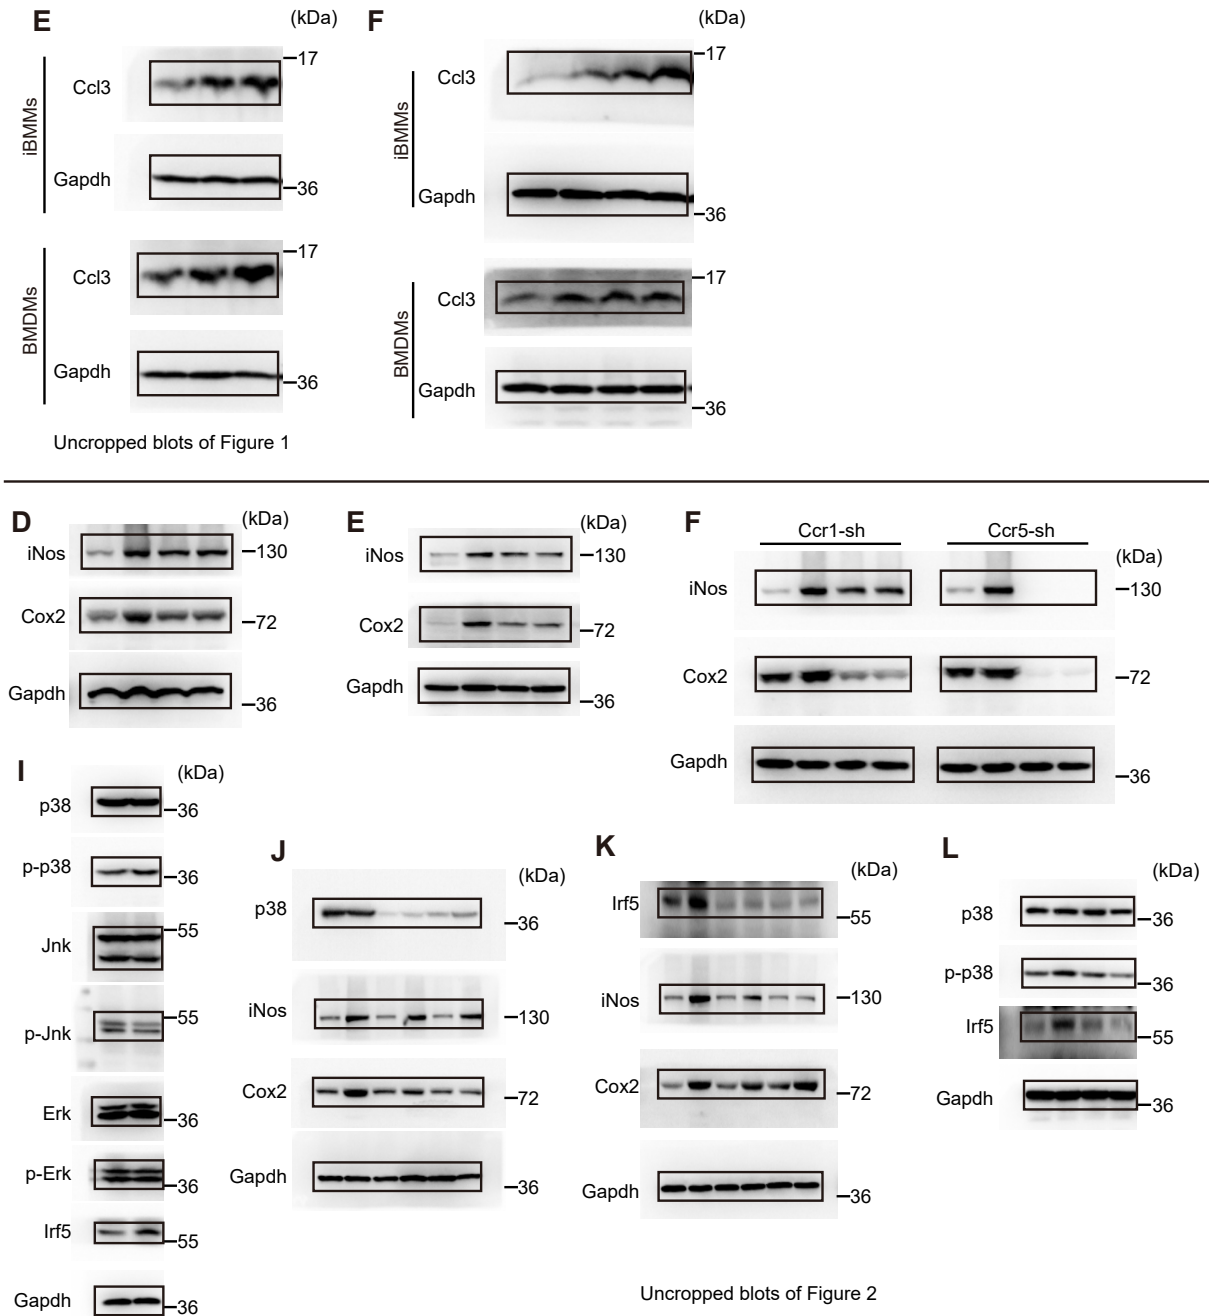

Supplement: jitc-2021-003793supp012.pdf [file jitc-2021-003793supp012.pdf]

**Figure S10**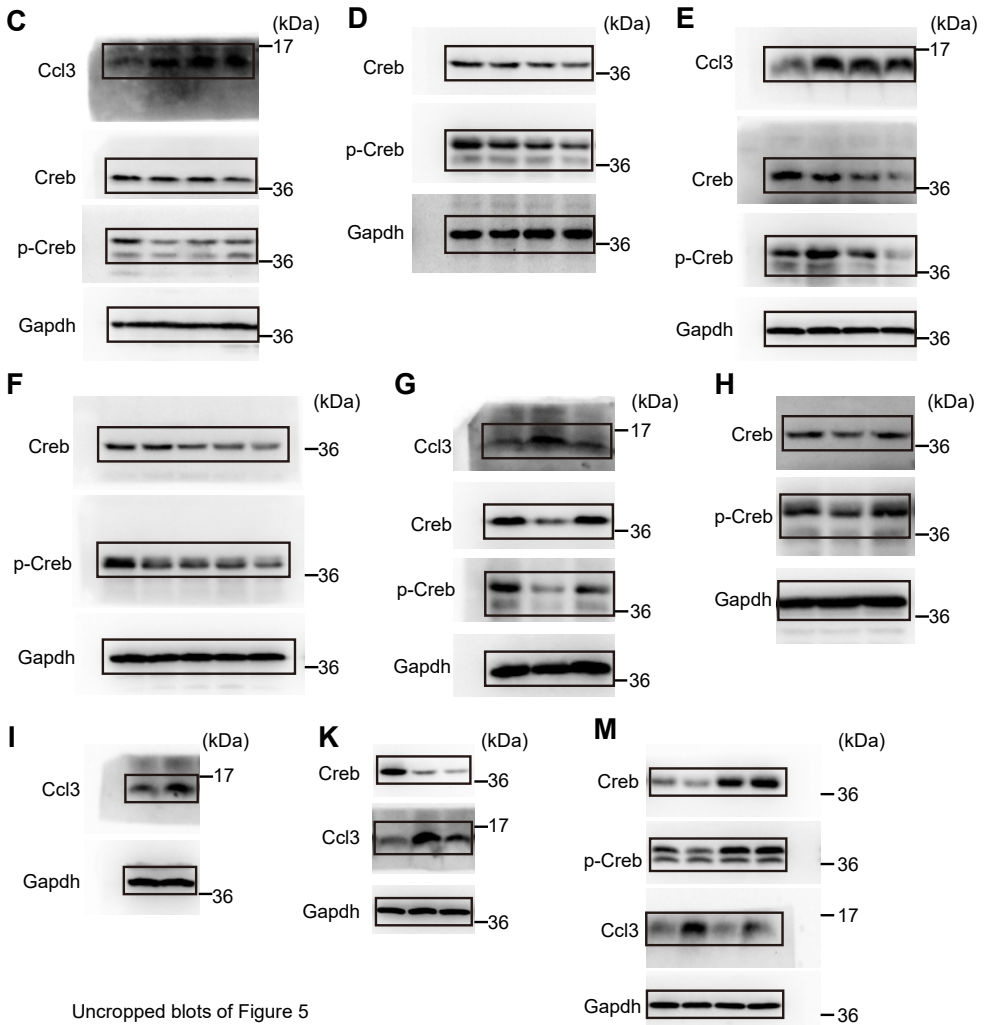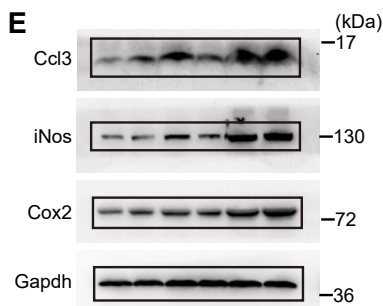

Uncropped blots of Figure 6

Supplement: jitc-2021-003793supp013.pdf [file jitc-2021-003793supp013.pdf]

**Figure S11**

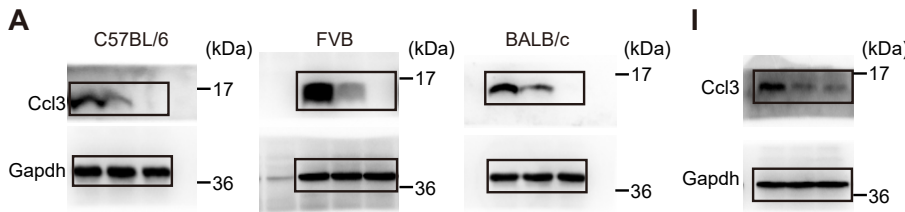

Uncropped blots of Figure S2

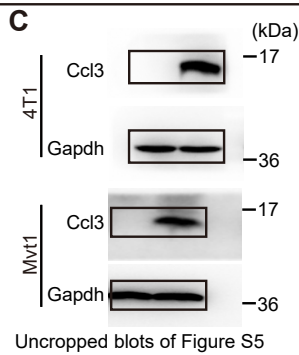

Uncropped blots of Figure S5

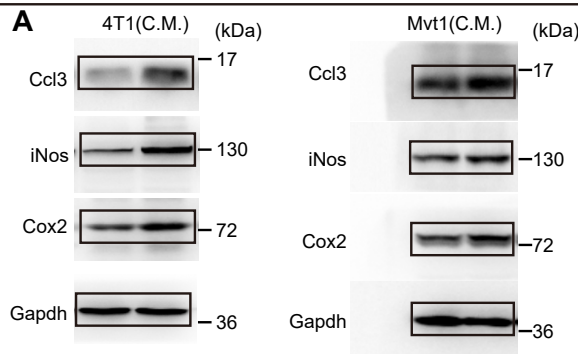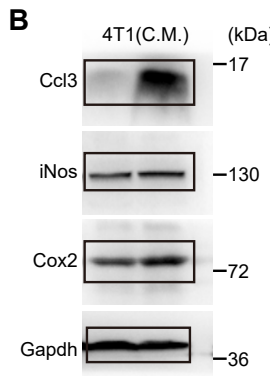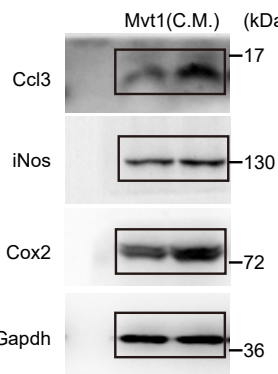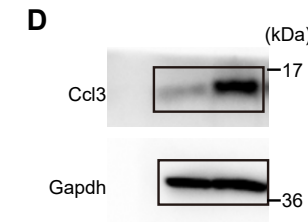

Uncropped blots of Figure S6

Supplement: jitc-2021-003793supp014.pdf [file jitc-2021-003793supp014.pdf]

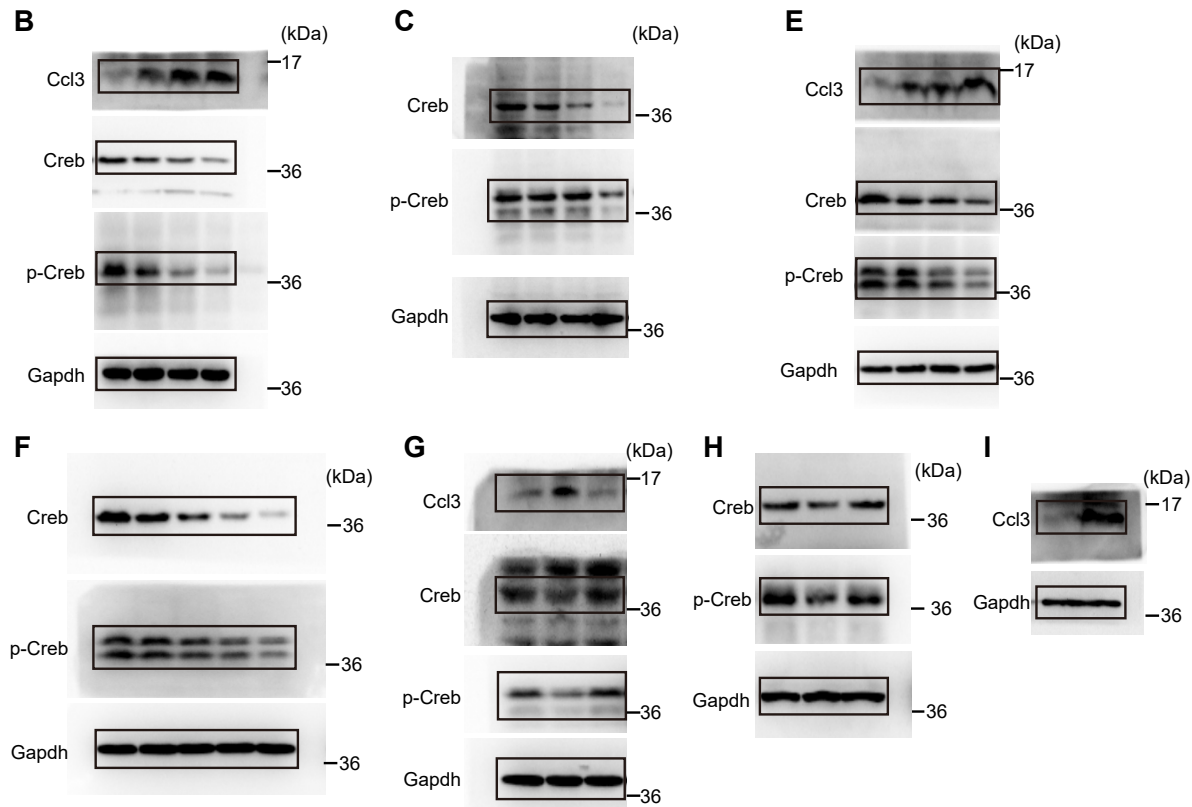

Uncropped blots of Figure S7

Supplement: jitc-2021-003793supp015.pdf [file jitc-2021-003793supp015.pdf]
